# Supplementary material
Source: HighWire-hosted journal article supplement (https://www.cmaj.ca/highwire/filestream/148899/field_highwire_adjunct_files/1/221512-res-2-at.pdf)
Supplement: 221512-res-2-at.pdf [file 221512-res-2-at.pdf]

**Supplementary Table 1:** Number and crude rate of primary cancer diagnoses by site, stage, and period in Alberta

| Cancer     | Stage       | Pre-COVID<br>(2018.01-2020.03) | SOE<br>(2020.03-2020.06) | Post-SOE<br>(2020.06-2020.12) |
|------------|-------------|--------------------------------|--------------------------|-------------------------------|
| Bladder    | 0 (in situ) | 1102 (320.3)                   | 107 (305.7)              | 217 (249.4)                   |
|            | I           | 354 (102.9)                    | 51 (145.7)               | 74 (85.1)                     |
|            | II          | 161 (46.8)                     | 21 (60)                  | 43 (49.4)                     |
|            | III         | 108 (31.4)                     | 11 (31.4)                | 19 (21.8)                     |
|            | IV          | 104 (30.2)                     | 14 (40)                  | 13 (14.9)                     |
|            | Unknown     | 218 (63.4)                     | 13 (37.1)                | 47 (54)                       |
| Breast     | I           | 4279 (1243.9)                  | 294 (840)                | 988 (1135.6)                  |
|            | II          | 983 (285.8)                    | 98 (280)                 | 234 (269)                     |
|            | III         | 467 (135.8)                    | 30 (85.7)                | 111 (127.6)                   |
|            | IV          | 346 (100.6)                    | 31 (88.6)                | 90 (103.4)                    |
|            | Unknown     | 255 (74.1)                     | 21 (60)                  | 64 (73.6)                     |
| Cervix     | I           | 217 (63.1)                     | 22 (62.9)                | 56 (64.4)                     |
|            | II          | 84 (24.4)                      | 9 (25.7)                 | 16 (18.4)                     |
|            | III         | 28 (8.1)                       | 0 (0)                    | 6 (6.9)                       |
|            | IV          | 15 (4.4)                       | 4 (11.4)                 | 9 (10.3)                      |
|            | Unknown     | 0 (0)                          | 0 (0)                    | 0 (0)                         |
| Colorectal | I           | 731 (212.5)                    | 33 (94.3)                | 139 (159.8)                   |
|            | II          | 866 (251.7)                    | 75 (214.3)               | 195 (224.1)                   |
|            | III         | 1025 (298)                     | 103 (294.3)              | 221 (254)                     |
|            | IV          | 930 (270.3)                    | 88 (251.4)               | 202 (232.2)                   |
|            | Unknown     | 1429 (415.4)                   | 80 (228.6)               | 279 (320.7)                   |
| Kidney     | I           | 758 (220.3)                    | 78 (222.9)               | 129 (148.3)                   |
|            | II          | 57 (16.6)                      | 4 (11.4)                 | 13 (14.9)                     |
|            | III         | 289 (84)                       | 34 (97.1)                | 50 (57.5)                     |
|            | IV          | 181 (52.6)                     | 13 (37.1)                | 48 (55.2)                     |
|            | Unknown     | 175 (50.9)                     | 14 (40)                  | 33 (37.9)                     |
| Lung       | I           | 1060 (308.1)                   | 104 (297.1)              | 255 (293.1)                   |
|            | II          | 400 (116.3)                    | 46 (131.4)               | 72 (82.8)                     |
|            | III         | 799 (232.3)                    | 93 (265.7)               | 166 (190.8)                   |

|          |         |              |             |             |
|----------|---------|--------------|-------------|-------------|
|          | IV      | 2294 (666.9) | 253 (722.9) | 520 (597.7) |
|          | Unknown | 473 (137.5)  | 36 (102.9)  | 92 (105.7)  |
| Melanoma | I       | 637 (185.2)  | 41 (117.1)  | 178 (204.6) |
|          | II      | 250 (72.7)   | 27 (77.1)   | 52 (59.8)   |
|          | III     | 187 (54.4)   | 17 (48.6)   | 39 (44.8)   |
|          | IV      | 79 (23)      | 8 (22.9)    | 14 (16.1)   |
|          | Unknown | 857 (249.1)  | 38 (108.6)  | 163 (187.4) |
| NHL      | I       | 654 (11)     | 41 (9.5)    | 129 (9.5)   |
|          | II      | 1593 (26.9)  | 80 (18.5)   | 237 (17.5)  |
|          | III     | 967 (16.3)   | 78 (18.1)   | 237 (17.5)  |
|          | IV      | 707 (11.9)   | 64 (14.8)   | 182 (13.5)  |
|          | Unknown | 2009 (33.9)  | 169 (39.1)  | 566 (41.9)  |
| Prostate | I       | 663 (192.7)  | 41 (117.1)  | 129 (148.3) |
|          | II      | 1608 (467.4) | 80 (228.6)  | 239 (274.7) |
|          | III     | 975 (283.4)  | 78 (222.9)  | 239 (274.7) |
|          | IV      | 712 (207)    | 64 (182.9)  | 182 (209.2) |
|          | Unknown | 2013 (585.2) | 171 (488.6) | 571 (656.3) |
| Uterus   | I       | 1008 (293)   | 103 (294.3) | 234 (269)   |
|          | II      | 72 (20.9)    | 4 (11.4)    | 20 (23)     |
|          | III     | 152 (44.2)   | 20 (57.1)   | 36 (41.4)   |
|          | IV      | 112 (32.6)   | 11 (31.4)   | 28 (32.2)   |
|          | Unknown | 134 (39)     | 15 (42.9)   | 49 (56.3)   |
